# Supplementary material
Source: Springer Nature journal article supplement (https://mijn.bsl.nl/resource/supplementary/13047_2012_468_MOESM2_ESM.pdf/7111574)
Supplement: MOESM2 [file 7111574]

# Paediatric flat foot

Flexible

Rigid

Pain

No pain

Age: > 8- 10  
years

Age: < 8-10  
years

*Consider: Joint hypermobility / increased weight or obesity / gender  
(consider weight loss or strengthening exercise, as indicated)*

Function not  
OK

Function OK

*Review differential diagnoses:  
Neurological / muscular / genetic / collagen (family history)*

## Treat

Footwear, Foot orthoses – usually generic, unless juvenile arthritis

## Monitor

FPI-6 normative data/age  
(Feet should not get 'flatter' over time)
